# Supplementary material for: Identifying amyloid-related diseases by mapping mutations in low-complexity protein domains to pathologies
Source: Nat Struct Mol Biol. 2022 May 30;29(6):529–36. doi: 10.1038/s41594-022-00774-y (PMC9205782; doi:10.1038/s41594-022-00774-y)
Supplement: Source Data Extended Data Fig. 9 — Statistical source data [file 41594_2022_774_MOESM13_ESM.xlsx]

## Sheet: Extended Data Fig. 9a
Beta-sheet propensities				count	WT	Mutant
V	2			1	D	R	WT	0.55	Mutant	0.85		0.854545
I	1.79			1	D	V	WT	0.55	Mutant	2		1.15909
F	1.4			1	F	L	WT	1.4	Mutant	1.15
Y	1.37			3	G	A	WT	0.67	Mutant	0.75
C	1.36			3	G	C	WT	0.67	Mutant	1.36
W	1.23			3	G	V	WT	0.67	Mutant	2
T	1.21			2	G	R	WT	0.67	Mutant	0.85
L	1.15			3	G	S	WT	0.67	Mutant	0.81
M	1.01			1	S	N	WT	0.81	Mutant	0.63
H	0.99			2	Y	C	WT	1.37	Mutant	1.36
R	0.85			1	Y	H	WT	1.37	Mutant	0.99
S	0.81
K	0.76
A	0.75
Q	0.72
G	0.67
E	0.65
N	0.63
D	0.55
P	0.4

## Sheet: Extended Data Fig. 9b
LARKS freq (>0 or <45 cutoff)																					Total amino acids number in zippers and full-length
G	GLY	68	10.7936	10.7936	count	WT	Mutant														G	116	2.10909
F	PHE	10	1.5873	1.5873	1	D	R	WT	0.47619	Mutant	0.15873										F	72	1.30909
A	ALA	8	1.26984	1.26984	1	D	V	WT	0.47619	Mutant	0.15873										A	73	1.32727
Y	TYR	7	1.11111	1.11111	1	F	L	WT	1.5873	Mutant	0.31746										Y	68	1.23636
Q	ASN	4	0.634921	0.634921	3	G	A	WT	10.7936	Mutant	1.26984										Q	63	1.14545
M	MET	4	0.634921	0.634921	3	G	C	WT	10.7936	Mutant	0.15873										M	23	0.418182
E	GLU	4	0.634921	0.634921	3	G	V	WT	10.7936	Mutant	0.15873										E	39	0.709091
D	ASP	3	0.47619	0.47619	2	G	R	WT	10.7936	Mutant	0.15873										D	27	0.490909
N	GLN	3	0.47619	0.47619	3	G	S	WT	10.7936	Mutant	0.47619										N	84	1.52727
S	SER	3	0.47619	0.47619	1	S	N	WT	0.47619	Mutant	0.47619										S	93	1.69091
K	LYS	3	0.47619	0.47619	2	Y	C	WT	1.11111	Mutant	0.15873										K	48	0.872727
L	LEU	2	0.31746	0.31746	1	Y	H	WT	1.11111	Mutant	0										L	85	1.54546
P	PRO	2	0.31746	0.31746																	P	12	0.218182
R	ARG	1	0.15873	0.15873																	R	10	0.181818
C	CYS	1	0.15873	0.15873																	C	3	0.054545
V	VAL	1	0.15873	0.15873																	V	114	2.07273
W	TRP	0	0	0																	W	11	0.2
H	HIS	0	0	0																	H	28	0.509091
T	THR	0	0	0																	T	59	1.07273
I	ILE	0	0	0																	I	72	1.30909
		2.94737
